# Supplementary material for: Nanoparticles in road dust from impervious urban surfaces: distribution, identification, and environmental implications
Source: Royal Society of Chemistry journal article supplement (doi:10.1039/c6en00056h), 2016-01-01
Supplement: c6en00056h1.pdf [file c6en00056h1.pdf]

# Potentially aerosolized nanoparticles in road dust from Shanghai: Distribution, identification, and environmental implications

Yi Yang<sup>†§\*</sup>, Marina Vance<sup>‡</sup>, Feiyun Tou<sup>†</sup>, Andrea Tiwari<sup>‡</sup>, Min Liu<sup>†</sup>, Michael F. Hochella, Jr.<sup>§#</sup>

<sup>†</sup>Key Laboratory of Geographic Information Science of the Ministry of Education, Shanghai Key lab for Urban Ecological Processes and Eco-Restoration, East China Normal University, 3663 North Zhongshan Road, Shanghai, 200062, China

<sup>‡</sup>Center for Sustainable Nanotechnology, Institute for Critical Technology and Applied Science, Virginia Tech, Blacksburg, VA 24061, USA

<sup>§</sup>The Center for NanoBioEarth, Department of Geosciences, Virginia Tech, Blacksburg, VA 24061, USA

<sup>#</sup>Geosciences Group, Energy and Environment Directorate, Pacific Northwest National Laboratory, Richland, WA 99352, USA

## - Supplemental information -

### Contents:

1. Description of sampling sites (Table S1)
2. Description of the dust aerosolization methods (Figure S1)
3. Detection limits of trace elements (Table S2)
4. Metal concentrations and distribution in bulk dust (Figure S2, S3)
5. Grain size distribution in bulk dust (Figure S4)
6. Metal concentrations and distribution in aerosolized dust samples (Figure S5, S6)
7. Principal component analysis (PCA) (Table S3)
8. Relationship between metal concentrations in aerosolized and bulk dust samples (Figure S7)
9. Electron microscopy imaging of aerosolized dust samples (Figure S8, S9, S10)
10. Aerosol characteristics, emission factors, and enrichment factors (Table S4, S5)

## 1. Description of sampling sites

**Table S1.** Description of sampling sites

| Sampling site | Location | Latitude (°N) | Longitude (°E) | Sites ambient environment |
|---------------|----------|---------------|----------------|---------------------------|
|---------------|----------|---------------|----------------|---------------------------|

|    |           |           |            |                                                                |
|----|-----------|-----------|------------|----------------------------------------------------------------|
| 1  | Minhang   | 31°00'45" | 121°19'39" | heavy traffic density road (mainly are diesel-powered trucks)  |
| 2  | Jinshan   | 30°51'54" | 121°17'44" | rural road, close to farmland                                  |
| 3  | Jinshan   | 30°52'19" | 121°08'15" | heavy traffic density road in an industrial area               |
| 4  | Jinshan   | 30°48'01" | 121°10'52" | within the range of a petrochemical industrial area            |
| 5  | Jinshan   | 30°47'47" | 121°15'42" | scarce traffic, sparsely populated area, near an e-waste plant |
| 6  | Jinshan   | 30°43'29" | 121°17'40" | within the range of a petrochemical industrial area            |
| 7  | Jinshan   | 30°42'37" | 121°17'27" | within the range of a petrochemical industrial area            |
| 8  | Jinshan   | 30°43'50" | 121°21'57" | near a high-speed rail train station                           |
| 9  | Jinshan   | 30°45'51" | 121°23'45" | scarce traffic, sparsely populated area, next to a power plant |
| 10 | Fengxian  | 30°51'14" | 121°30'08" | rural road, close to farmers' house                            |
| 11 | Fengxian  | 30°51'08" | 121°31'14" | industrial area, adjacent to many factories' warehouses        |
| 12 | Fengxian  | 31°00'31" | 121°30'02" | rural road                                                     |
| 13 | Pudong    | 31°01'44" | 121°34'13" | in a residential area                                          |
| 14 | Fengxian  | 30°56'36" | 121°35'34" | rural road, close to farmers' house                            |
| 15 | Pudong    | 30°53'55" | 121°54'58" | a remote, scarce traffic, sparsely populated area              |
| 16 | Pudong    | 30°56'52" | 121°48'06" | rural road, close to farmlands                                 |
| 17 | Pudong    | 31°00'54" | 121°45'12" | near an airport area                                           |
| 18 | Pudong    | 31°06'34" | 121°42'19" | rural road                                                     |
| 19 | Pudong    | 31°09'40" | 121°47'33" | near an airport area                                           |
| 20 | Pudong    | 31°14'45" | 121°42'15" | in a high-tech industrial park                                 |
| 21 | Pudong    | 31°14'52" | 121°36'23" | in a manufacturing industrial park                             |
| 22 | Minhang   | 31°05'29" | 121°29'52" | close to a heat & power plant, heavy traffic density road      |
| 23 | Pudong    | 31°10'56" | 121°29'31" | next to the Shanghai World Expo site                           |
| 24 | Pudong    | 31°11'48" | 121°35'37" | in university campus, next to a library                        |
| 25 | Pudong    | 31°13'17" | 121°32'13" | heavy traffic density, prosperous and densely populated area   |
| 26 | Pudong    | 31°14'09" | 121°30'21" | in the center of CBD                                           |
| 27 | Pudong    | 31°16'37" | 121°34'45" | near a residential area                                        |
| 28 | Pudong    | 31°20'24" | 121°37'19" | heavy traffic density in a free trade zone, mainly are trucks  |
| 29 | Pudong    | 31°22'08" | 121°30'12" | near a large-scale sand mining ship factory                    |
| 30 | Baoshan   | 31°24'39" | 121°29'17" | in a green/park area within the range of a steel plant         |
| 31 | Baoshan   | 31°21'47" | 121°25'55" | near a residential area                                        |
| 32 | Yangpu    | 31°20'18" | 121°30'25" | outside the gate of a university campus                        |
| 33 | Yangpu    | 31°18'18" | 121°30'37" | in a densely populated and busy cars commercial district       |
| 34 | Songjiang | 31°06'29" | 121°10'34" | within a national forest park area                             |
| 35 | Songjiang | 31°05'30" | 121°11'35" | within a national forest park area                             |
| 36 | Songjiang | 31°02'56" | 121°12'27" | in university campus                                           |
| 37 | Songjiang | 30°59'55" | 121°02'34" | heavy traffic density road (mainly are buses, automobiles)     |
| 38 | Jiading   | 31°18'17" | 121°10'11" | near a civic square, scarce traffic                            |
| 39 | Jiading   | 31°21'18" | 121°13'37" | scarce traffic, sparsely populated area                        |
| 40 | Jiading   | 31°26'54" | 121°16'12" | heavy traffic density road (mainly are diesel-powered trucks)  |

|    |           |           |            |                                                                                      |
|----|-----------|-----------|------------|--------------------------------------------------------------------------------------|
| 41 | Baoshan   | 31°28'17" | 121°19'25" | heavy traffic density road, near the exit of highway toll station                    |
| 42 | Baoshan   | 31°27'25" | 121°24'38" | highly polluted area by a power plant, busy traffic                                  |
| 43 | Zhabei    | 31°18'52" | 121°23'22" | in university campus, next to teaching buildings                                     |
| 44 | Yangpu    | 31°16'60" | 121°32'10" | in a green/park area                                                                 |
| 45 | Hongkou   | 31°15'34" | 121°30'35" | close to an open green square                                                        |
| 46 | Xuhui     | 31°11'48" | 121°26'00" | in a densely populated and busy cars commercial district                             |
| 47 | Xuhui     | 31°09'21" | 121°25'20" | near Shanghai south railway station                                                  |
| 48 | Zhabei    | 31°14'39" | 121°27'06" | next to Shanghai railway station, busy flow of people and cars                       |
| 49 | Putuo     | 31°13'55" | 121°23'56" | in university campus                                                                 |
| 50 | Putuo     | 31°17'15" | 121°20'17" | in a green/park area                                                                 |
| 51 | Yangpu    | 31°17'11" | 121°29'51" | in university campus; a heavy traffic area where the inner ring viaduct passes by    |
| 52 | Huangpu   | 31°12'32" | 121°27'27" | in a shopping street close to a stadium                                              |
| 53 | Huangpu   | 31°14'02" | 121°28'00" | People's Square where having densely people and cars, commercial area                |
| 54 | Minhang   | 31°10'36" | 121°25'00" | in a high-tech industrial park                                                       |
| 55 | Yangpu    | 31°15'07" | 121°29'45" | commercial/residential buildings along both sides of road                            |
| 56 | Jing'an   | 31°13'25" | 121°26'33" | in a densely populated and busy cars commercial district                             |
| 57 | Zhabei    | 31°17'47" | 121°25'57" | in a high-tech industrial park                                                       |
| 58 | Minhang   | 31°02'57" | 121°28'20" | close to a heat & power plant, heavy traffic density road, chemical engineering area |
| 59 | Xuhui     | 31°07'28" | 121°27'43" | near an entrance of overpass                                                         |
| 60 | Minhang   | 31°13'16" | 121°19'40" | in a green/park area, outside is a shopping and snack street                         |
| 61 | Minhang   | 31°09'21" | 121°21'17" | near a residential area                                                              |
| 62 | Changning | 31°11'30" | 121°21'33" | heavy traffic density near Shanghai zoo                                              |
| 63 | Yangpu    | 31°18'58" | 121°31'50" | in a green/park area                                                                 |
| 64 | Huangpu   | 31°11'37" | 121°28'02" | near an entrance of underground tunnel, heavy traffic density                        |
| 65 | Hongkou   | 31°16'26" | 121°28'45" | next to Shanghai football stadium, busy traffic volume                               |
| 66 | Putuo     | 31°16'38" | 121°26'10" | in a green/park area                                                                 |

## 2. Detection limits of trace elements

Detection limit (DL) of each analyzed trace element is listed in Table S2.

**Table S2.** Detection limits (DL) of trace elements ( $\mu\text{g/L}$ )

|    | DL ( $\mu\text{g/L}$ ) |    | DL ( $\mu\text{g/L}$ ) |
|----|------------------------|----|------------------------|
| V  | 0.23                   | Zn | 0.38                   |
| Cr | 0.1                    | As | 0.07                   |
| Fe | 0.79                   | Sr | 0.24                   |
| Mn | 0.05                   | Mo | 0.72                   |
| Co | 0.04                   | Sn | 0.24                   |

|    |      |    |      |
|----|------|----|------|
| Ni | 0.1  | Ba | 0.92 |
| Cu | 0.19 | Pb | 1    |

---

### 3. Description of the dust aerosolization methods

Inlet air was conditioned using a hydrocarbon trap and a high efficiency particulate air (HEPA) filter to a particle concentration  $<5 \text{ cm}^{-3}$  and passed through a mass flow controller prior to entering the disperser.

Following aerosolization, samples were passed through a PM<sub>2.5</sub> cyclone (URG-2000-30EN, URG Corp.) to eliminate larger particles and directed to one of three sampling trains:

- Using sampling train A, aerosolized dust was drawn onto pre-weighed 47 mm Teflon filters (JAWP04700, Millipore) using an air sampling pump operating at  $9 \text{ L min}^{-1}$  (Leland Legacy, SKC Corp). The filters were pre-cleaned by soaking in 10% HNO<sub>3</sub> overnight. Filters were digested and analyzed for metal concentrations. (66 samples)
- Using sampling train B, particles were drawn at  $1 \text{ L min}^{-1}$  through a Microanalysis Particle Sampler (California Measurements) with 200-mesh copper TEM grids with lacey carbon support film (Electron Microscopy Sciences) affixed to the second and third collection stages ( $D_{50}$  cutoff points of 300 nm and 50 nm, respectively). (Selected 9 samples, including sample 5, 7, 26, 42, 47, 48, 51, 53 and 66)
- Using sampling train C, aerosolized dust was directed into a 520 L polyethylene chamber (AtmosBag, Sigma Aldrich) filled with particle-scrubbed air ( $<5 \text{ cm}^{-3}$ ) to allow sufficient time for the aerosol sizing instruments to collect data. Aerosol size distributions were measured using a Scanning Mobility Particle Sizer and an Aerodynamic Particle Sizer (3936NL and 3321, TSI) operated in 4-min scans. Resulting size datasets were merged using DataMerge (TSI) to produce one size distribution spanning 10 nm – 20  $\mu\text{m}$ . Following each dispersion, the chamber was evacuated and refilled until a background aerosol number concentration was  $\leq 10 \text{ \# cm}^{-3}$  (average  $2.4 \pm 1.0 \text{ \# cm}^{-3}$  in this study). (Selected 12 samples, including 5, 7, 9, 13, 26, 35, 42, 47, 48, 51, 53, 66)

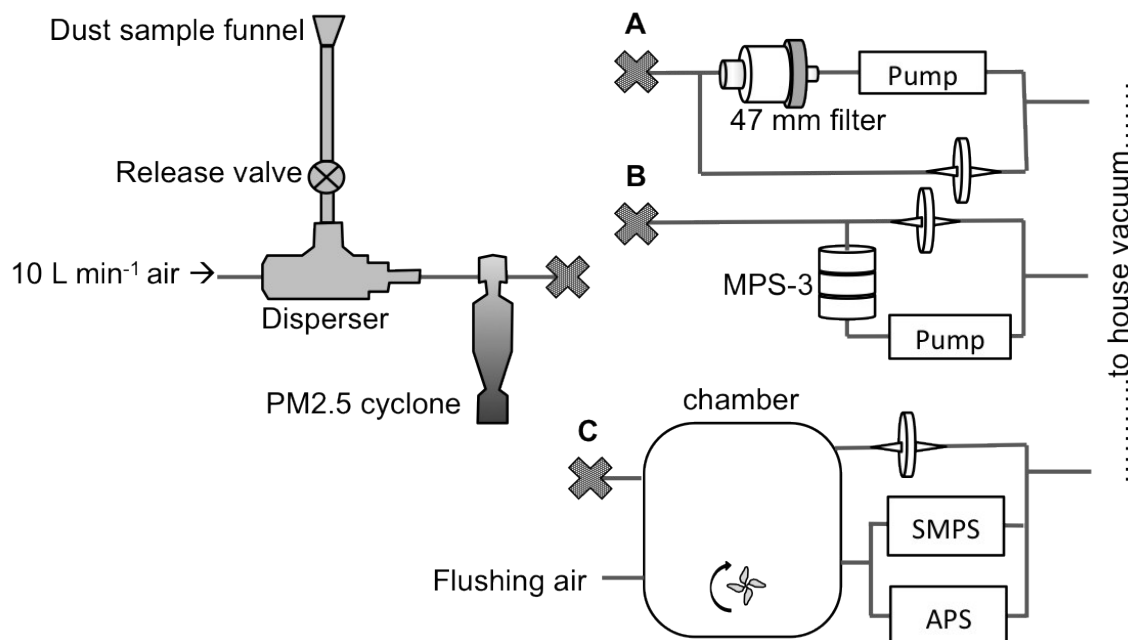

**Fig. S1** Aerosolization system. Only one sampling train was employed at a time, attached at the “X” on the aerosol generation system. Because the disperser generates an instantaneous puff of aerosols, each sample was collected on the filter and MPS-3 for 10 seconds. SMPS/APS samples were measured for operated for approximately 10 seconds for each sample. Aerosolized dust in the excess flow was captured using a vent filter. The disperser apparatus and cyclone were cleaned between dispersions by sonication in ultrapure water and air drying.

Quality assurance and quality control (QA/QC): All bulk dust samples were aerosolized in duplicate and further analyzed by ICP-MS for metal concentration. The relative standard deviation (RSD) values for each metal concentration was less than 22%. After each aerosolization procedure, the whole aerosolization system was disassembled, air flushed and cleaned in Milli-Q water by ultrasonic bath. Blank controls were tested for background contamination from the aerosolization system and no/negligible target metal contamination was detected from the blank controls in our experiments. The RSD value was less than 30% for the peak measurement of all size distributions, which further attests to the repeatability of the aerosolization technique used in this study

#### 4. Metal concentrations and distribution in bulk dust

The concentrations of heavy metals in Shanghai street dust samples are shown in Fig. S2. Iron concentrations were in the range of 14,000-150,000 mg kg<sup>-1</sup> with the average of 30,745 mg kg<sup>-1</sup>, which is 1-6 orders of magnitude

higher than other metals. Mn, Zn and Ba followed with average concentrations of 768, 716 and 538 mg kg<sup>-1</sup>, respectively. It is noticeable that lead concentrations ranged from 18.5 to 3192 mg kg<sup>-1</sup> with an average of 213 mg kg<sup>-1</sup>. Sr and Cu had average concentrations of 189 and 134 mg kg<sup>-1</sup>, respectively.

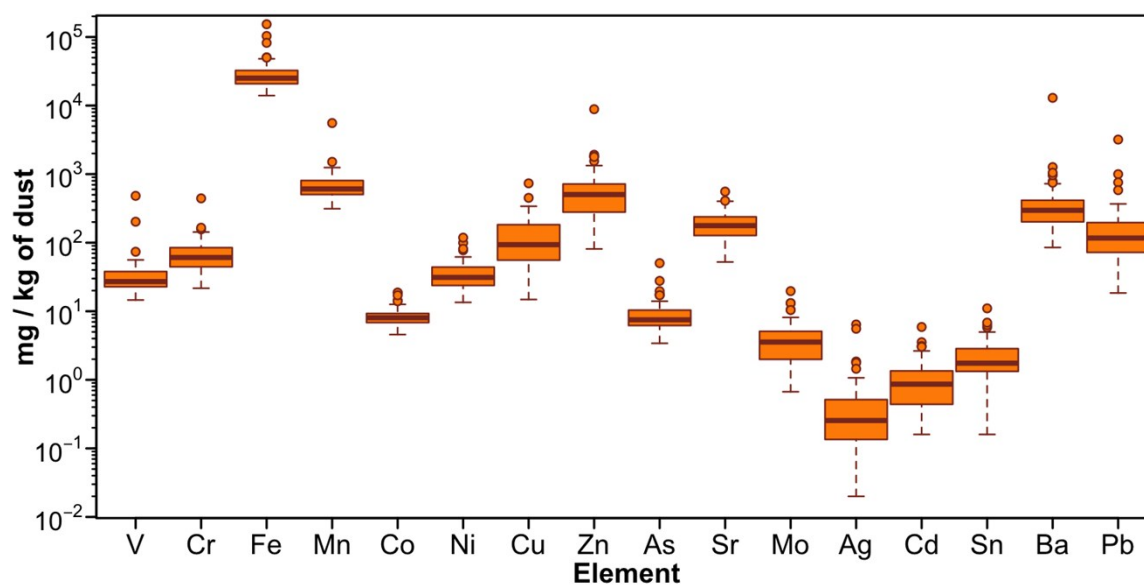

**Fig. S2** Concentrations of heavy metals in bulk street dust samples from Shanghai

Spatial distributions of metals, including V, Cr, Fe, Mn, Co, Ni, Cu, Zn, As, Cd, Sn, Ba and Pb were generated using GIS. As shown in Supplementary Fig. S3 online, there is a generally similar distribution pattern for metals in Shanghai. The spots with relatively elevated concentrations were found not only in the downtown area, but also in the northern and southern areas where the Jinshan, Baoshan, and Pudong districts are located.

The highest concentrations of V, Cr and Mn were found in site 42, nearby a coal power plant in the Baoshan district. Site 51, which had the highest concentrations of Fe, Co, Zn and Ba was located on a downtown campus, in a heavy traffic area near the inner ring viaduct. The highest Cu and As concentrations were found in site 58, located near the Minhang powerplant and a number of chemical plants. The highest concentration of Cd was found in site 53, near a downtown commercial center. Sites 5, 6 and 7 were located in the Jinshan district, where there is a petrochemical industry area, and were elevated concentrations of Ni, Mo and Pb were found. The highest concentration of lead (3192 mg kg<sup>-1</sup>) was measured in site 5, near an electronics waste (e-waste) recycling plant.

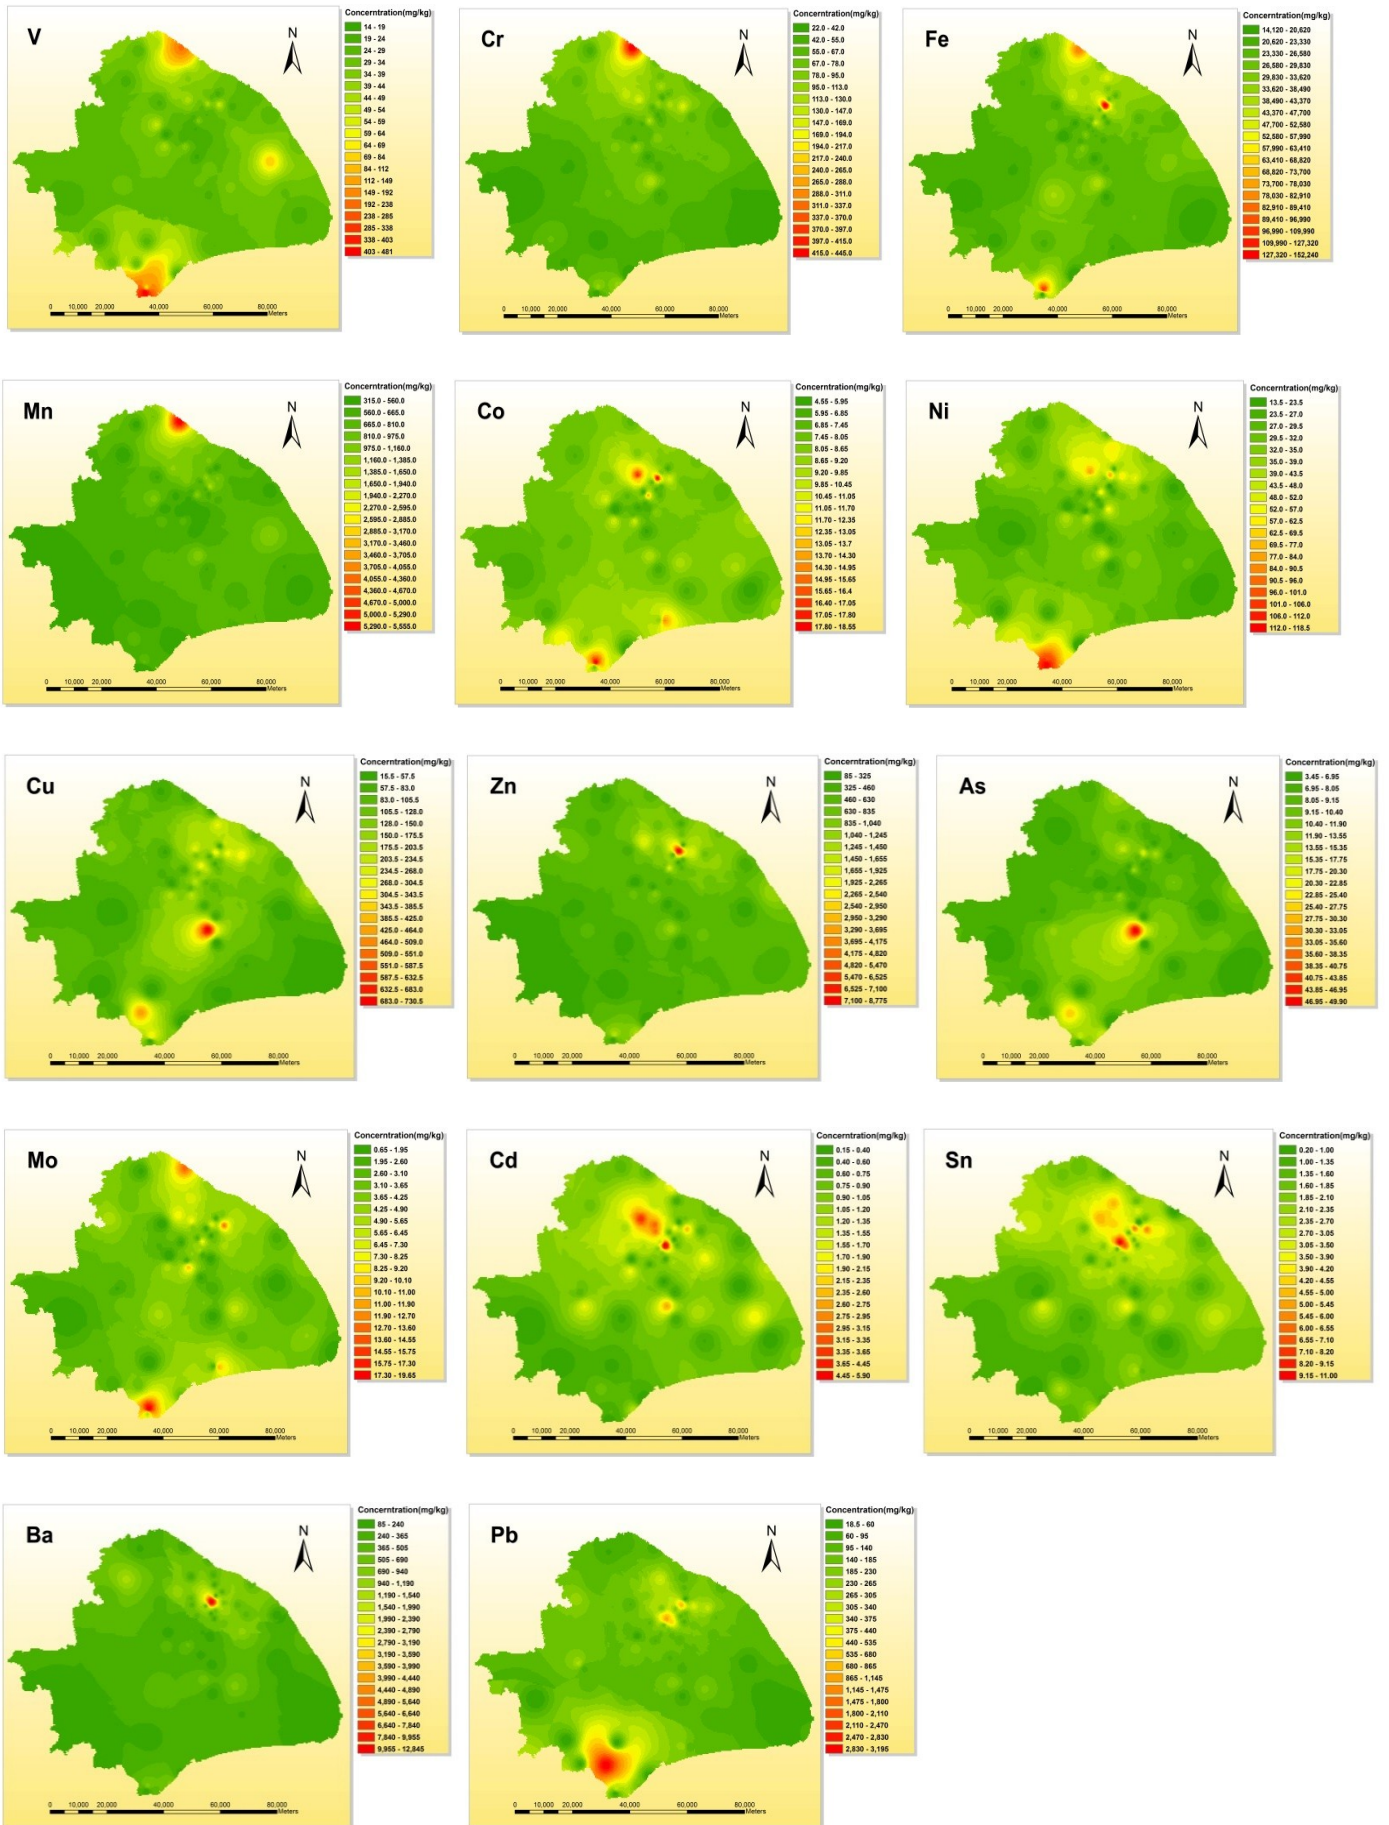

Fig. S3 GIS maps of metals in bulk dust in Shanghai.

## 5. Grain size distribution in bulk dust

The grain size distribution of bulk samples were measured using a laser diffraction particle size analyzer (LS13320, Berckman). Results showed that the PM2.5 fraction represented 4-18 % of the total volume of bulk dust with an average contribution of 9% (Supplementary Fig. S4 online). Additionally, PM2.5 represented more than 10% of the total dust volume in 30% of samples, which is a significant amount considering the small volume that individual PM2.5 particles contribute to overall dust samples. Although the volume contribution of PM2.5 to the total dust is lower than all other measured fractions, this size range is of particular significance for its environmental and health-related implications.

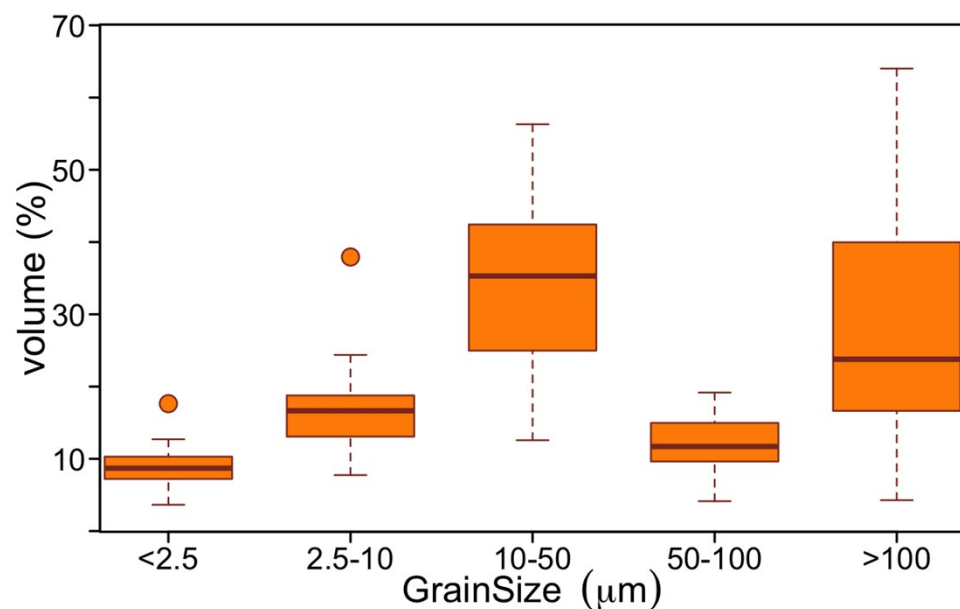

Fig S4 Size distribution of bulk dust samples in Shanghai.

## 6. Metal concentrations and distribution in aerosolized dust samples



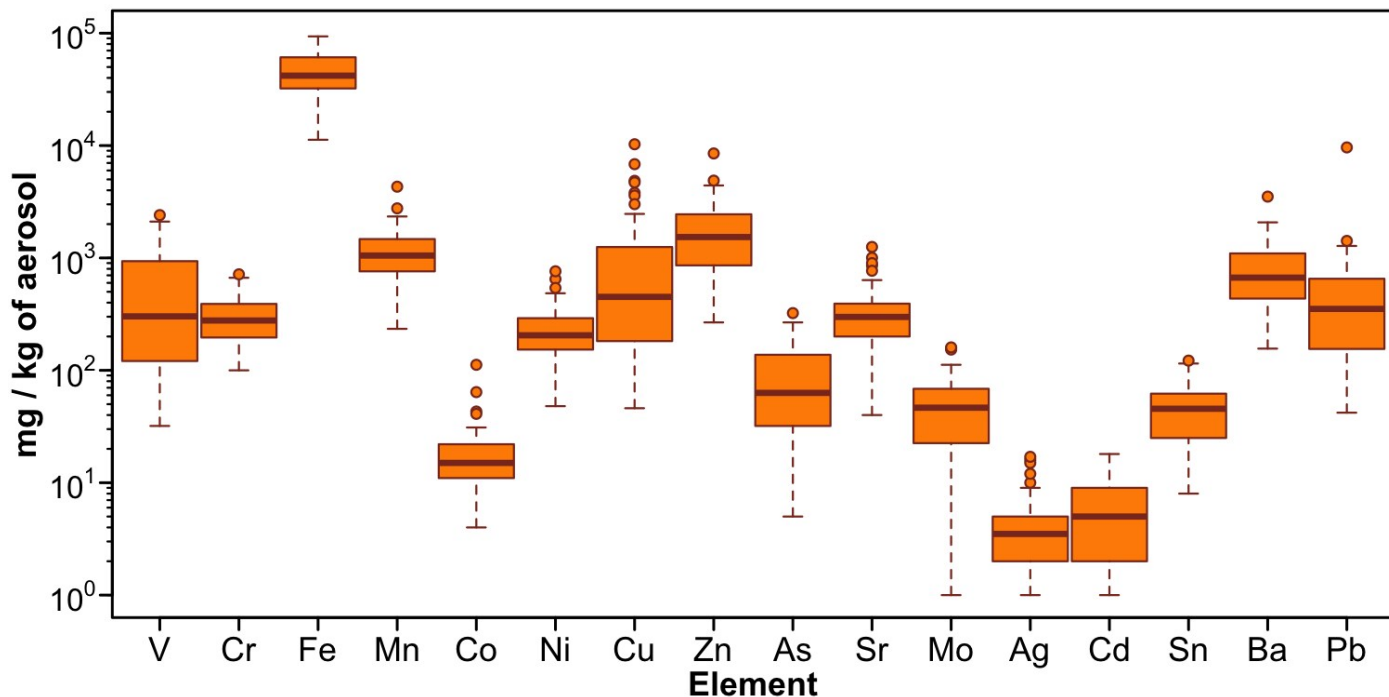

Fig. S5 Metal concentrations in all aerosolized dust samples

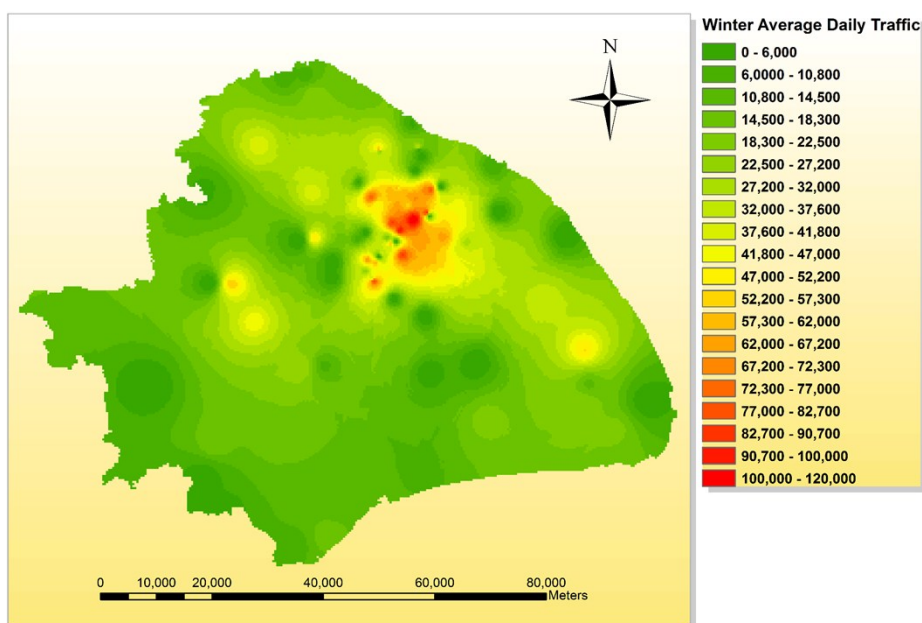

Fig. S6 GIS maps of average winter traffic volumes in Shanghai. (Data source: Shanghai Road Administration Bureau.

According to data from 84 traffic volume monitoring points near our sampling sites)

## 7. Principal component analysis (PCA)

PCA was performed using SPSS software following a varimax rotation method for the source apportionment of metals in the aerosolized dust samples. Data from site 5 was not included due to the elevated Pb contamination in that sample.

As presented in Table S3, four components were identified. PC1 had the highest loading: Fe, Mn, Co and Ni

explaining 25.7% of the variance. Fe, Mn, Co and Ni were found to be originating mainly from the steel industry and automobile manufacturing industry, which are widely distributed in the Baoshan, Jiading, and Jinshan districts in Shanghai. PC2 explained 21.9% of the variance and was related to V, As, Mo and Sn, indicating mixed sources as these metals are used in various industries. PC3 was linked to Zn, Cd, Ba and Pb, explaining 20.6% of the variance and indicating vehicle emissions as a significant source. Pb is an indicator of vehicle exhaust pollution, Cd might be related to fossil fuel burnings, and Zn and Ba are typical contaminants originating from vehicular brake wear. PC4 was related to Cr and Cu, explaining 11.5% of the variance. Cu is used as a main raw material in various products, thus it could come from the manufacturing industry, which is mainly located in the Jinshan district.

**Table S3** Results of principal component analysis carried out for source apportionment of metals in sampling sites.

|                                      | PC1         | PC2         | PC3         | PC4         |
|--------------------------------------|-------------|-------------|-------------|-------------|
| V                                    | -0.00       | <b>0.95</b> | -0.12       | -0.08       |
| Cr                                   | 0.53        | 0.28        | 0.14        | <b>0.69</b> |
| Fe                                   | <b>0.76</b> | 0.04        | 0.47        | 0.11        |
| Mn                                   | <b>0.89</b> | 0.01        | 0.25        | -0.05       |
| Co                                   | <b>0.82</b> | 0.05        | 0.08        | -0.09       |
| Ni                                   | <b>0.65</b> | 0.38        | 0.31        | 0.32        |
| Cu                                   | -0.23       | -0.20       | -0.04       | <b>0.89</b> |
| Zn                                   | 0.23        | -0.13       | <b>0.84</b> | 0.15        |
| As                                   | -0.09       | <b>0.92</b> | 0.03        | -0.10       |
| Mo                                   | 0.59        | <b>0.70</b> | -0.04       | -0.05       |
| Cd                                   | -0.12       | 0.08        | <b>0.67</b> | -0.23       |
| Sn                                   | 0.42        | <b>0.74</b> | -0.03       | 0.34        |
| Ba                                   | 0.35        | -0.07       | <b>0.80</b> | 0.08        |
| Pb                                   | 0.32        | -0.04       | <b>0.82</b> | 0.08        |
| Eigenvalues                          | 3.60        | 3.07        | 2.88        | 1.61        |
| Percentage of variance explained (%) | 25.7        | 21.9        | 20.6        | 11.5        |

## 8. Relationship between metal concentrations in aerosolized and bulk dust samples

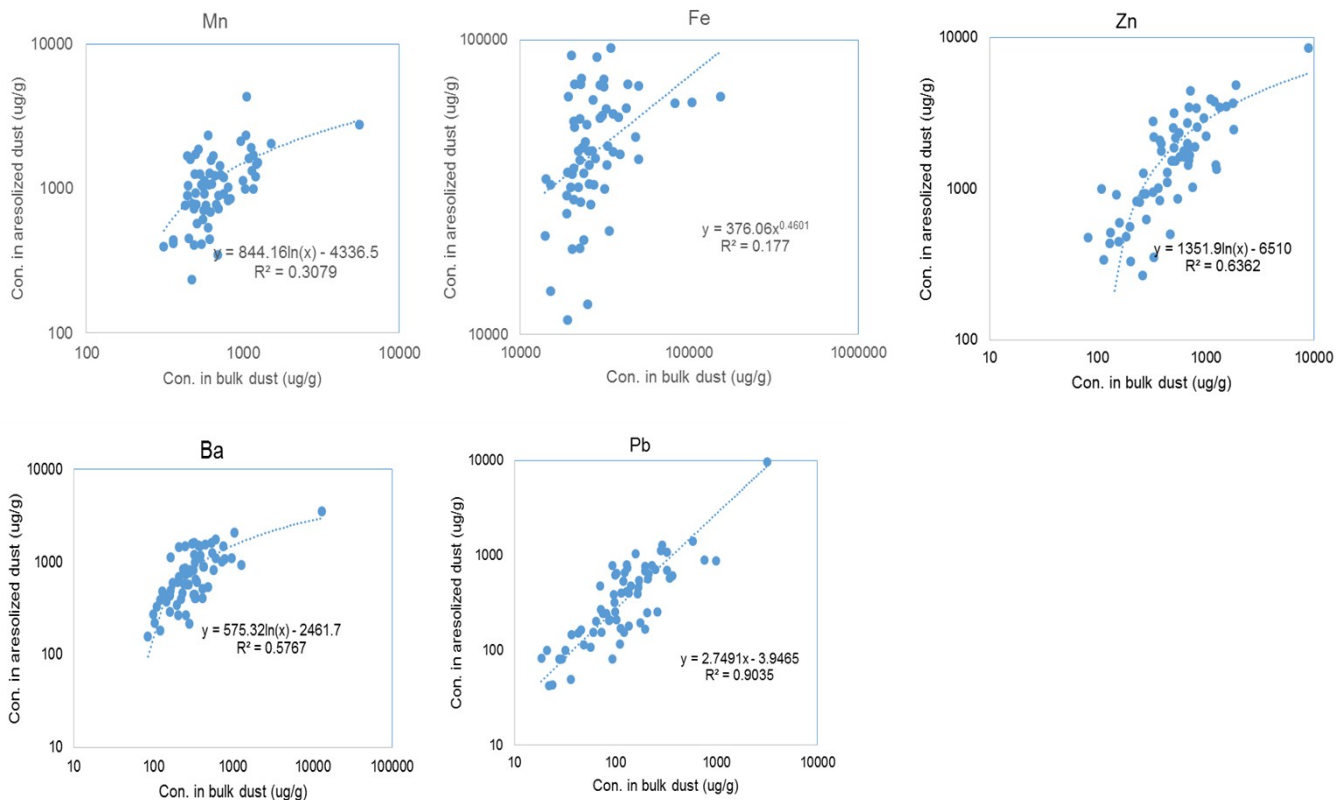

**Fig. S7** Correlation between metal concentrations in aerosolized and bulk dust samples

## 9. Electron microscopy imaging of aerosolized dust samples

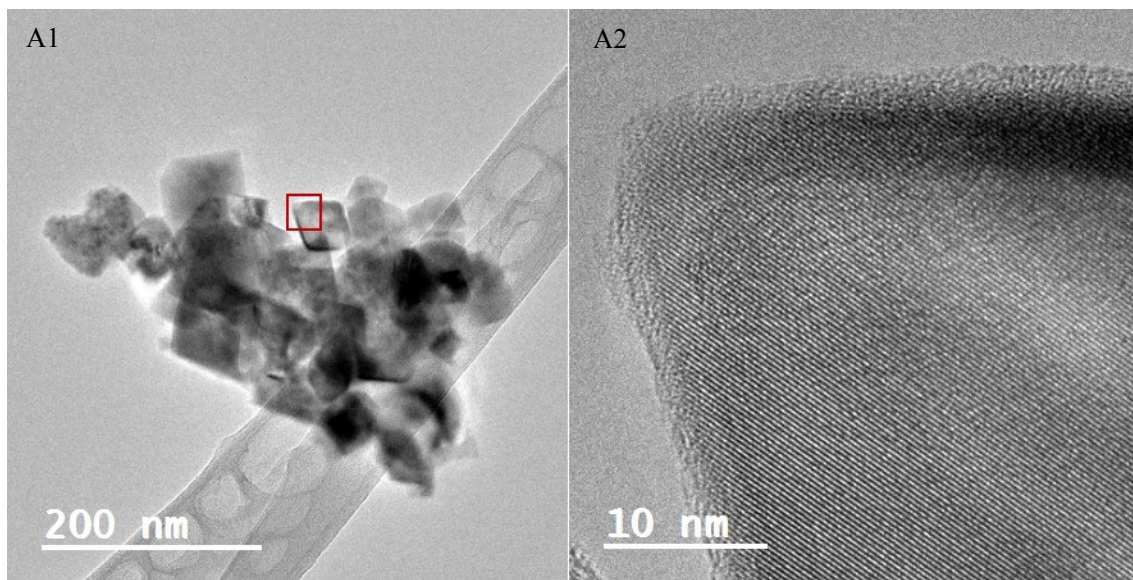

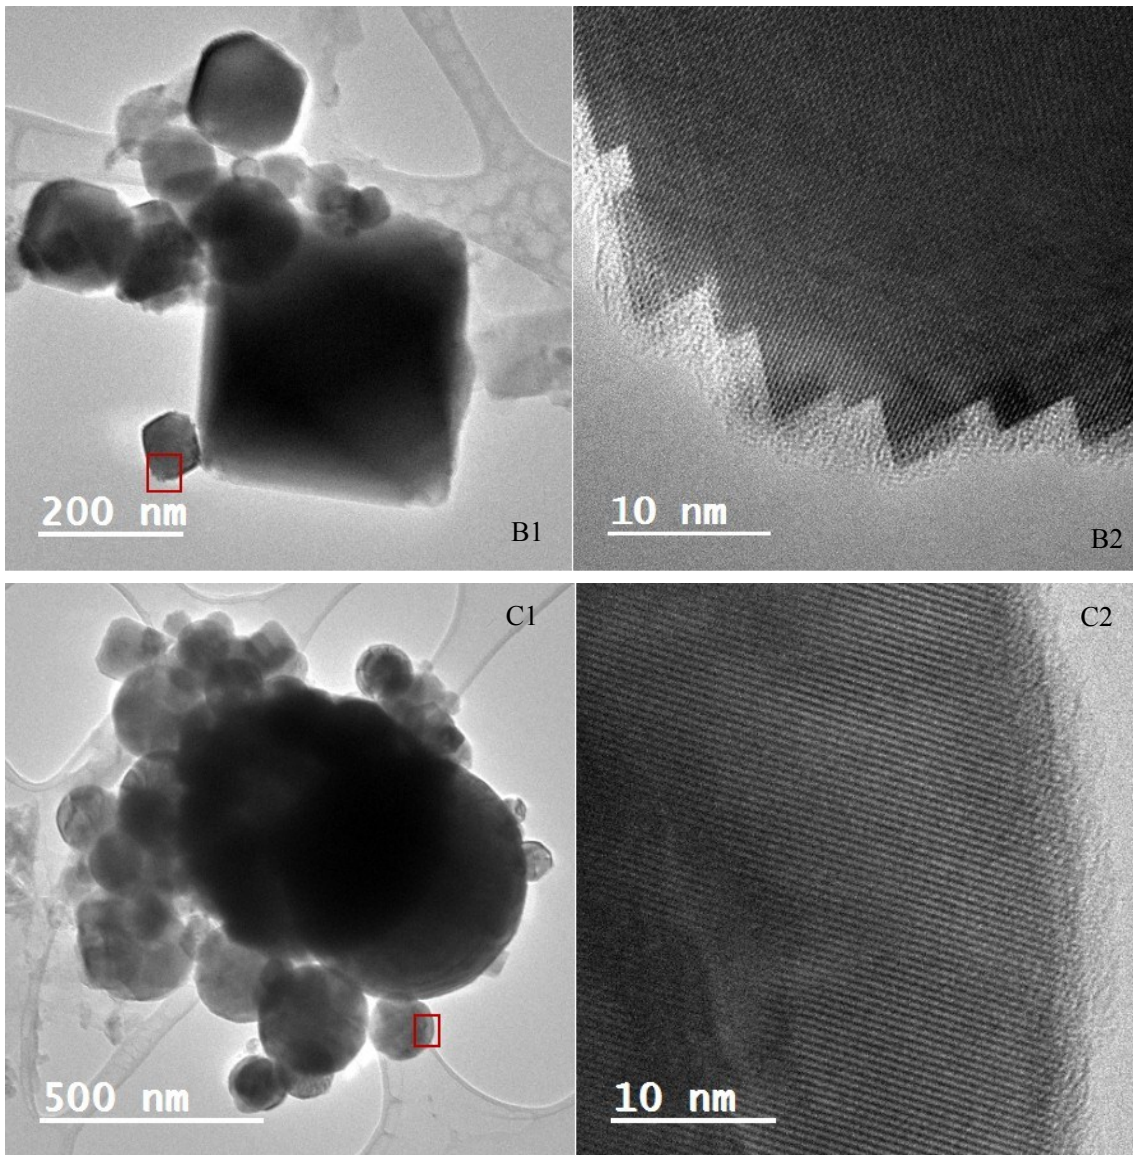

**Fig. S8** Magnetite particles (A1-C1) with various morphologies and primary sizes found in dust samples and A2-C2 are the magnified image of the selected area in A1-C1, showing the lattice fringe of planes (2 2 0) and (1 1 1). A1 shows an aggregate of magnetite NPs with sizes ranging from 30 to 80 nm; B1 shows a magnetite particle with a clear octahedral shape of about 400 nm aggregated with small particles in the size of 40-150 nm. C1: These spherical magnetite are large particles (500-600 nm) surrounded by small spherules (50-200nm).



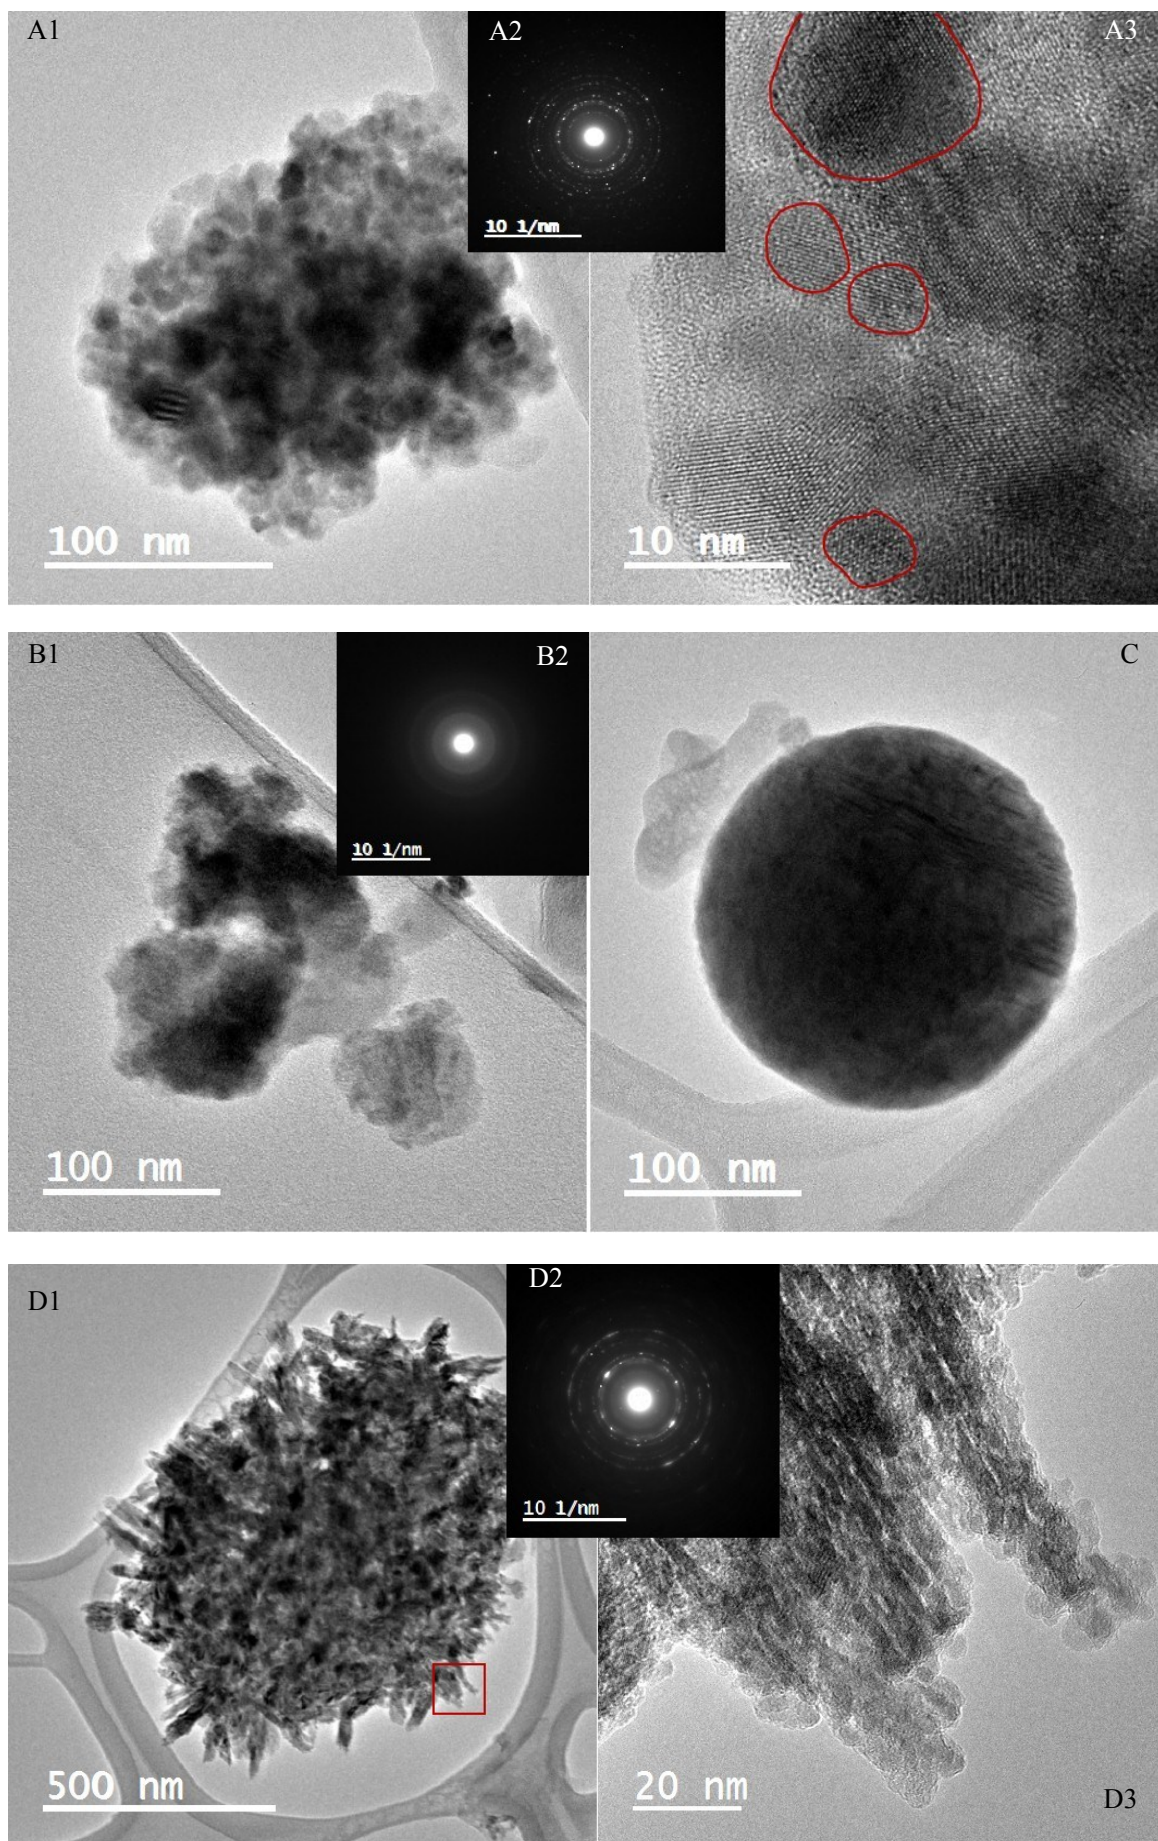

**Fig. S9** Iron NPs, including hematite (A), ferrihydrite (B), Fe-riched fly ash (C) and goethite (D) identified in



aerosolized dust samples. A2, B2 and D2 are the corresponding SAED images for NPs shown in A1, B1 and D1, respectively, and A3 and D3 are the magnified images of selected areas in A1 and D1.

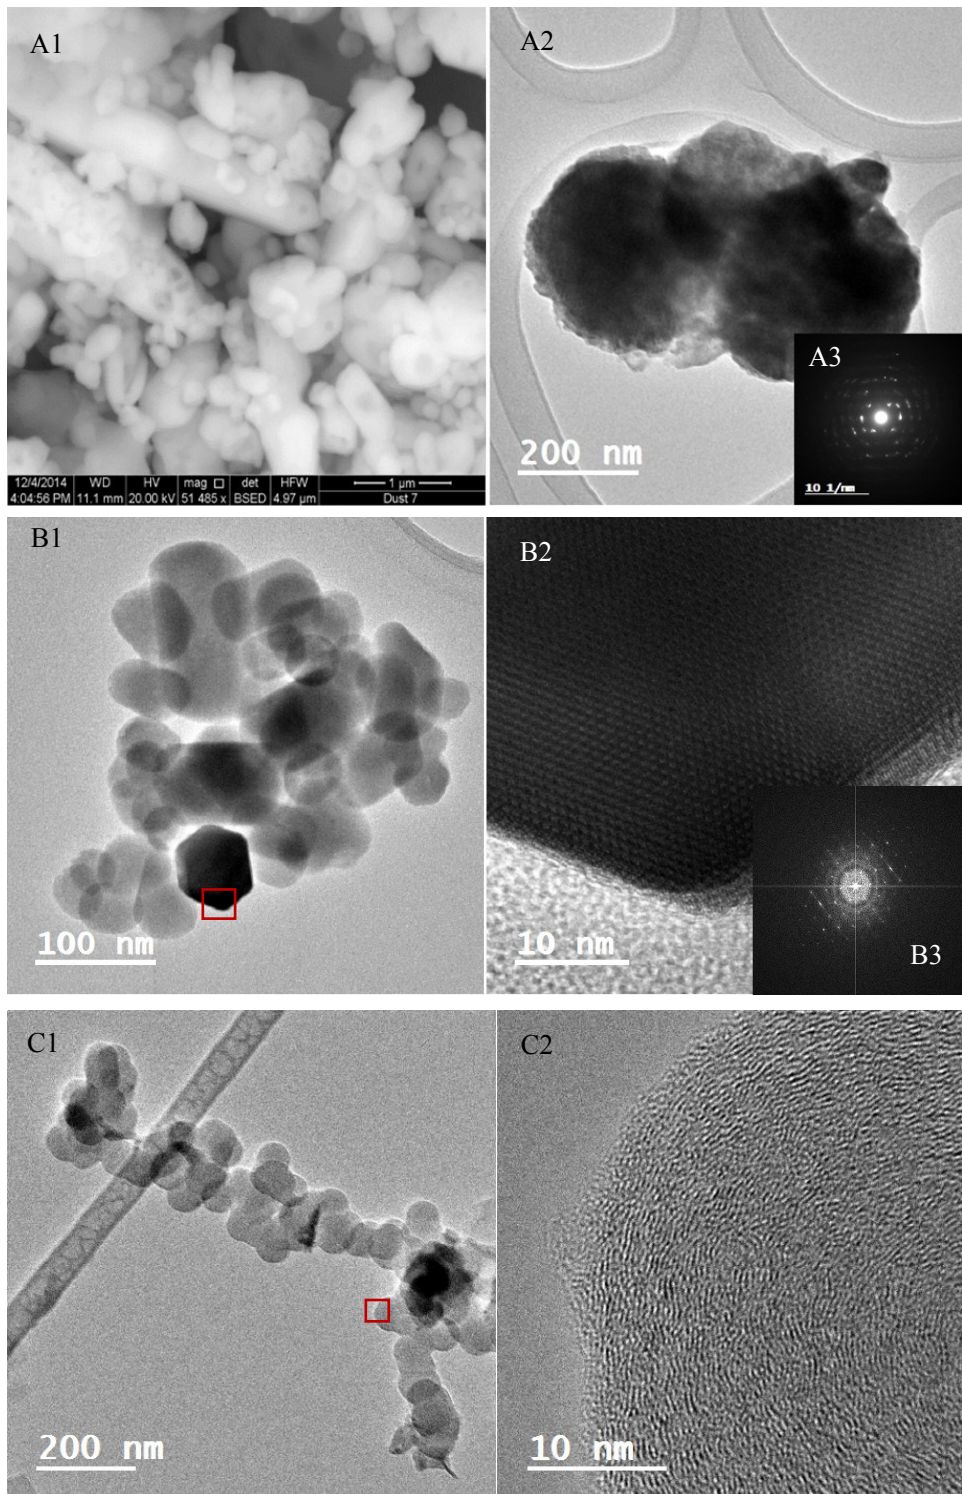

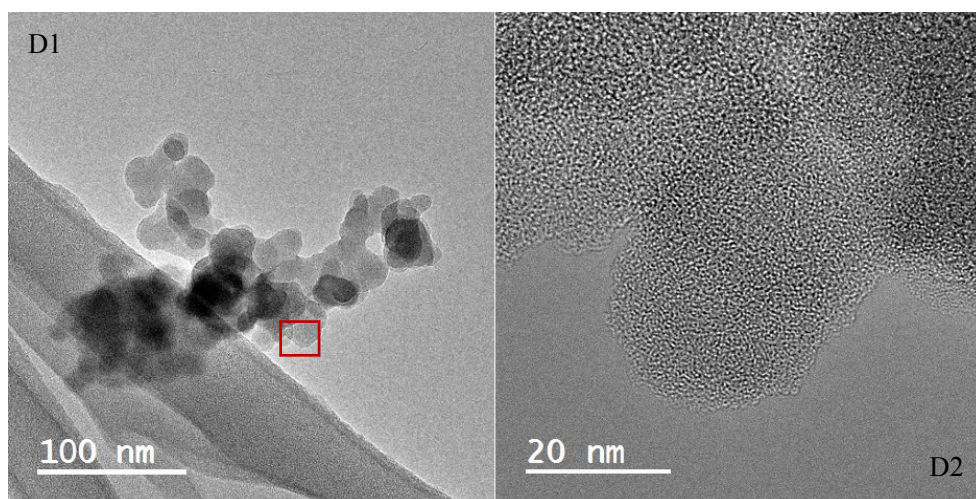

**Fig. S10** Other typical NPs, including barite (A), hydroxyapatite (B), soot (C) and amorphous silica (D) found in aerosolized dust samples. B2-D2 are the magnified image of the selected area in B1-D1. A3 is the SAED of a single particle in A2; B3 is the corresponding FFT image of B2.

## 10. Aerosol characteristics, emission factors, and enrichment factors

**Table S4.** Aerosol characteristics and emission factors (average  $\pm$  standard error).

| Sampling site  | Median aerosol size (nm) | Primary peak aerosol size (nm) | Second peak aerosol size (nm) | Aerosol emission factor (particles per mg dust) | Aerosol mass emission factor ( $\mu\text{g}$ aerosol per mg dust) |
|----------------|--------------------------|--------------------------------|-------------------------------|-------------------------------------------------|-------------------------------------------------------------------|
| 5              | 29.8                     | 28.4                           | 897.7                         | $(7.2 \pm 0.2) \times 10^6$                     | $0.78 \pm 0.05$                                                   |
| 7              | 39.0                     | 35.2                           | 1036.6                        | $(4.3 \pm 0.3) \times 10^7$                     | $4.80 \pm 0.09$                                                   |
| 9              | 779.8                    | 264.2                          | ND                            | $(3.3 \pm 0.1) \times 10^6$                     | $0.82 \pm 0.03$                                                   |
| 13             | 47.7                     | 40.7                           | 897.7                         | $(2.0 \pm 0.1) \times 10^7$                     | $2.52 \pm 0.02$                                                   |
| 26             | 36.8                     | 32.8                           | 964.7                         | $(2.9 \pm 0.2) \times 10^7$                     | $3.60 \pm 0.09$                                                   |
| 35             | 140.8                    | 28.4                           | 897.7                         | $(1.1 \pm 0.4) \times 10^7$                     | $1.77 \pm 0.27$                                                   |
| 42             | 402.0                    | 378.6                          | ND                            | $(1.9 \pm 0.3) \times 10^7$                     | $6.68 \pm 0.56$                                                   |
| 47             | 41.3                     | 37.9                           | 1114.0                        | $4.7 \times 10^7^*$                             | $6.80^*$                                                          |
| 48             | 45.1                     | 37.9                           | 673.2                         | $(4.1 \pm 0.3) \times 10^6$                     | $0.85 \pm 0.04$                                                   |
| 51             | 445.9                    | 406.8                          | ND                            | $(6 \pm 2) \times 10^6$                         | $4.06 \pm 0.60$                                                   |
| 53             | 39.2                     | 35.2                           | 964.7                         | $1.6 \times 10^7^*$                             | $1.94^*$                                                          |
| 66             | 39.4                     | 32.8                           | 777.4                         | $2.2 \times 10^7^*$                             | $3.17^*$                                                          |
| <i>Average</i> | $174 \pm 73$             | $133 \pm 44$                   | $914 \pm 46$                  | $(1.9 \pm 0.4) \times 10^7$                     | $3.2 \pm 0.7$                                                     |

ND: Unimodal distribution; no secondary peak detected.

\* Only one sample was aerosolized due to insufficient sample mass for replicates.

**Table S5.** Aerosol enrichment factors, a ratio of metal concentrations in aerosol over bulk dust samples.

| Sampling site | Average aerosol enrichment factor ( <i>ef</i> ) |
|---------------|-------------------------------------------------|
| 5             | $(1.5 \pm 0.7) \times 10^4$                     |
| 7             | $(1.4 \pm 1.2) \times 10^3$                     |
| 9             | $(4.8 \pm 2.2) \times 10^3$                     |
| 13            | $(4.8 \pm 1.9) \times 10^3$                     |
| 26            | $(1.1 \pm 0.6) \times 10^4$                     |
| 35            | $(2.5 \pm 1.4) \times 10^4$                     |
| 42            | $(1.4 \pm 0.9) \times 10^4$                     |
| 47            | $(1.3 \pm 0.7) \times 10^4$                     |
| 48            | $(1.1 \pm 0.6) \times 10^4$                     |
| 51            | $(1.2 \pm 0.6) \times 10^4$                     |
| 53            | $(8.5 \pm 3.7) \times 10^3$                     |
| 66            | $(8.9 \pm 4.0) \times 10^3$                     |
